# Supplementary material for: Ab initio study of sodium intercalation into disordered carbon
Source: Royal Society of Chemistry journal article supplement (doi:10.1039/c5ta01443c), 2015-01-01
Supplement: c5ta01443c1.pdf [file c5ta01443c1.pdf]

## ***Ab initio* study of sodium intercalation into disordered carbon**

Ping-chun Tsai<sup>a,b</sup>, Sai-Cheong Chung<sup>a,c</sup>, Shih-kang Lin<sup>b</sup>, and Atsuo Yamada<sup>a,c,\*</sup>

# **Supporting information**

a Department of Chemical System Engineering, The University of Tokyo, 7-3-1

Hongo, Bunkyo-ku, Tokyo 113-8656, Japan;

b Department of Materials Science and Engineering, National Cheng Kung University,

Tainan 70101, Taiwan

c Unit of Element Strategy Initiative for Catalysts & Batteries, ESICB, Kyoto

University, Kyoto 615-8510, Japan

\*yamada@chemsys.t.u-tokyo.ac.jp

**Figures S1**

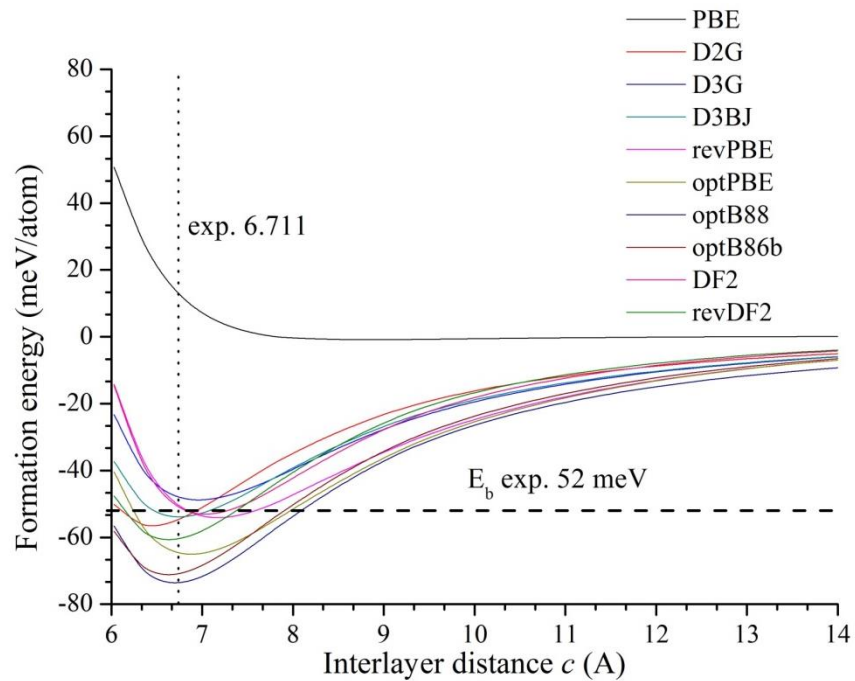

**Figure S1** Formation energies of graphite as a function of interlayer distance  $c$  calculated by GGA and nine different vdW functionals, where the minimum binding energy defines the equilibrium interlayer spacing  $c$ .

The formation energy of graphite is calculated from the change in total energies of  $E[\text{graphene sheets}]$  and  $E[\text{graphite}]$ .

**Figures S2**

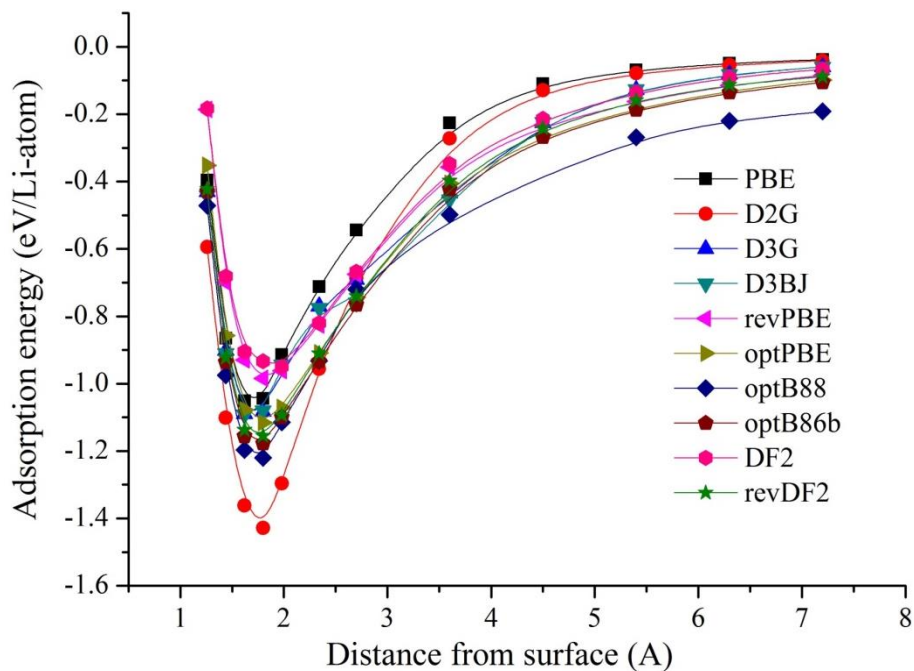

**Figure S2** Adsorption energies of Li as a function of distance from the graphene sheet calculated by GGA and nine different vdW functionals.

The adsorption energy ( $E_{ab}$ ) is defined to describe the stability of the adatom on hollow site of the surface according to the equation (2)

$$E_{ab} = E_{Li-surf} - E_{surf} - E_{Li} \quad (2)$$

where  $E_{Li-surf}$ ,  $E_{surf}$ , and  $E_{Li}$  are the total energies of the Li adatom adsorbed on the surface of graphene, the free surface of graphene, and the isolated Li atom.

**Figure S3**

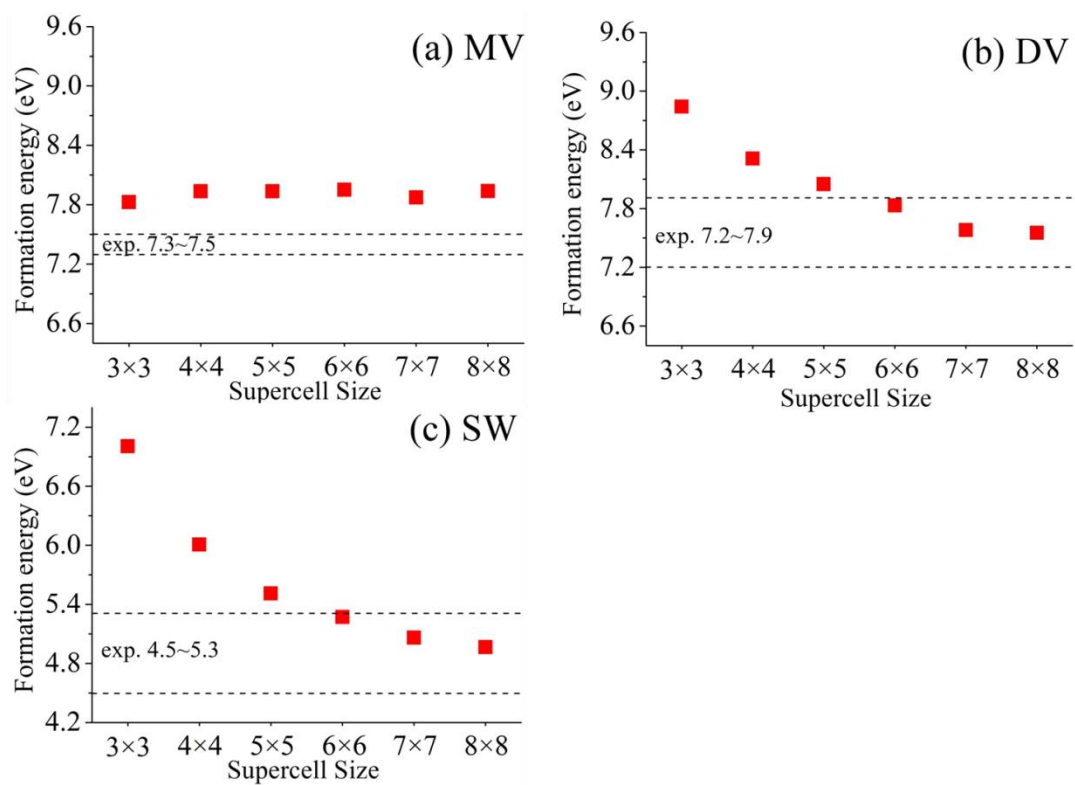

**Figure S3** Defect formation energies of MV, DV, and SW point defects from 3 x 3 to 8 x 8 supercell sizes of graphene.

**Table S1**

Charge transfer (e) from  $\text{Na}^+$  ions to graphene sheet and vertical distances ( $\text{\AA}$ ) between  $\text{Na}^+$  ion and the graphene sheet for Na adsorption on a graphene sheet and intercalation into layer between graphene sheets. Only the values for the most stable sites in each case are shown.

|               | Pristine                    | Mono-vacancy                | Di-vacancy                  | Stone-Wales                 |
|---------------|-----------------------------|-----------------------------|-----------------------------|-----------------------------|
| Adsorption    | 0.863 e / 2.13 $\text{\AA}$ | 0.983 e / 2.08 $\text{\AA}$ | 0.989 e / 1.90 $\text{\AA}$ | 0.992 e / 2.09 $\text{\AA}$ |
| Intercalation | 0.985 e / 1.98 $\text{\AA}$ | 0.985 e / 1.81 $\text{\AA}$ | 0.988 e / 1.63 $\text{\AA}$ | 0.986 e / 1.88 $\text{\AA}$ |
